# Supplementary material for: Structural insight into antibody-mediated antagonism of the Glucagon-like peptide-1 Receptor
Source: PubMed Central journal article supplement (PMC4872540; doi:10.1038/srep26236), 2016-05-19
Supplement: srep26236-s1.pdf [file srep26236-s1.pdf]

## Supplementary Information

### Structural insight into antibody-mediated antagonism of the Glucagon-like peptide-1 Receptor

**Stephanie Hennen,<sup>1</sup> János T. Kodra,<sup>2</sup> Vladyslav Soroka,<sup>3</sup> Berit O. Krogh,<sup>4</sup> Xiaoi Wu,<sup>5</sup> Peter Kaastrup,<sup>6</sup> Cathrine Ørskov,<sup>1</sup> Sif G. Rønn,<sup>1</sup> Gerd Schluckebier,<sup>3</sup> Silvia Barbateskovic,<sup>3</sup> Prafull S. Gandhi,<sup>7</sup> and Steffen Reedtz-Runge<sup>3</sup>.**

<sup>1</sup>Incretin Biology, <sup>2</sup>Protein & Peptide Chemistry 3, <sup>3</sup>Protein Structure, <sup>4</sup>Yeast Expression Systems, <sup>6</sup>Antibody Technology, <sup>7</sup>Protein Interaction, Novo Nordisk A/S, Novo Nordisk Park, DK-2760 Måløv, Denmark. <sup>5</sup>Protein Chemistry 1, Novo Nordisk A/S, Novo Nordisk China R&D, Beijing, China.

To whom correspondence should be addressed: Steffen Reedtz-Runge, Protein Structure, Novo Nordisk Park G8S438, Novo Nordisk A/S, DK-2760, Denmark. E-mail: [sffr@novonordisk.com](mailto:sffr@novonordisk.com). Phone: +4530754431



**Supplementary Method.** Binding of the GLP-1 and the BMS21 analogue to the isolated GLP-1R ECD was characterized by ITC in 10 mM Tris-HCL buffer pH 7.5, at 25°C, using an iTC200 calorimeter (Malvern). The sample cell contained 12  $\mu$ M GLP-1R ECD and the concentration of the injected ligands was 120  $\mu$ M. The heat associated with each injection of ligand was integrated and plotted against the molar ratio of ligand to macromolecule. Thermodynamic parameters were extracted from a curve fit to the data using the software (Origin 7.0) provided by Malvern according to a one-site binding model. Experiments were performed in triplicate with excellent reproducibility (<10% variation in thermodynamic parameters).

**Supplementary Reference.** Ewing, W.R. et al. N-terminally modified GLP-1 receptor modulators. Patent WO2006127948.
